# 1 **Maternally-inherited anti-sense piRNAs antagonize transposon expression in teleost** 2 **embryos**

3  
4 Yixuan Guo<sup>1</sup>, Krista R. Gert<sup>2,3</sup>, Svetlana Lebedeva<sup>4</sup>, Magdalena E. Potok<sup>1</sup>, Candice L. Wike<sup>1</sup>,  
5 Edward J. Grow<sup>1</sup>, René F. Ketting<sup>4</sup>, Andrea Pauli<sup>2</sup>, Bradley R. Cairns<sup>1\*</sup>

6  
7 <sup>1</sup>Howard Hughes Medical Institute, Department of Oncological Sciences and Huntsman Cancer  
8 Institute, University of Utah School of Medicine, Salt Lake City, Utah, USA

9  
10 <sup>2</sup>Research Institute of Molecular Pathology (IMP), Vienna BioCenter (VBC), Campus-Vienna-  
11 Biocenter 1, 1030 Vienna, Austria

12  
13 <sup>3</sup>Vienna BioCenter PhD Program, a Doctoral School of the University at Vienna and the Medical  
14 University of Vienna, 1030 Vienna, Austria

15  
16 <sup>4</sup>Institute of Molecular Biology (IMB), Mainz, Germany

17  
18 \*Correspondence: [brad.cairns@hci.utah.edu](mailto:brad.cairns@hci.utah.edu)

## 19 **Abstract**

20  
21 Transposable elements threaten genome stability, and the Piwi-piRNA system has evolved to  
22 silence transposons in the germline<sup>1-6</sup>. However, it remains largely unknown what mechanisms  
23 are utilized in early vertebrate embryos prior to germline establishment and ‘ping-pong’ piRNA  
24 production. To address this, we first characterized small RNAs in early zebrafish embryos and  
25 detected abundant maternally-deposited, Zwi-associated, antisense piRNAs that map largely to  
26 evolutionarily young long terminal repeat (LTR) retrotransposons. Notably, the focal  
27 establishment of the repressive modification H3K9me2/3 coincides with these young LTR  
28 elements, is deposited independent of transcription, and is required for LTR silencing. We find  
29 piRNAs highly enriched and maintained in primordial germ cells (PGCs), which display lower  
30 LTR expression than somatic cells. To examine the consequences of piRNA loss, we used  
31 reciprocal zebrafish-medaka hybrids, which display selective activation of LTRs that lack  
32 maternally-contributed targeting piRNAs. Thus, the Piwi-piRNA system actively antagonizes  
33 transposons in the soma and PGCs during early vertebrate embryogenesis.

## 34 **Results**

35  
36 To characterize the small non-coding RNA (sRNA) repertoire during zebrafish early  
37 embryogenesis and to assess the presence (and inheritance) of piRNAs, we performed sRNA-seq  
38 of pre-zygotic genome activation (ZGA) (2 hpf and 2.5 hpf) and post-ZGA (4 hpf, 5.3 hpf, 8 hpf  
39 and 24 hpf) embryos, as well as sperm and oocytes, with three biological replicates for each  
40 stage. sRNA size distribution revealed abundant piRNA-sized sRNAs (24-32 nt) present in early  
41 embryos and oocytes, but not in sperm (Figure 1A and S1B), which is consistent with the  
42 absence of Piwi proteins in mature sperm<sup>1</sup>. These maternally-deposited, piRNA-sized sRNAs  
43 dominate the pre-ZGA embryo sRNA repertoire (>86%, Figure 1A, right table), which resembles  
44 sRNA profile from 1-cell stage<sup>7</sup>. Following ZGA, an sRNA transition occurs, involving the  
45 known activation of the miR-430 locus<sup>8,9</sup> (Figure 1A).

46

47 To test whether these piRNA-sized sRNAs are truly piRNAs, we assessed their physical  
48 association with the sole zebrafish Piwi family protein present in the early embryos Ziwi by  
49 immunoprecipitation (IP) from zebrafish gametes and early embryos, as Zili protein is absent  
50 prior to 3 dpf<sup>7,10</sup>. We found that piRNA-sized sRNA (~30 nt) co-precipitated with Ziwi from  
51 oocytes and early embryos, but not sperm (Figure 1B). Furthermore, and consistent with these  
52 sRNAs being indeed piRNAs, the piRNA-sized population was not affected in *dicer-null*  
53 embryos whereas activation of miRNA expression was largely suppressed (Figure 1C).

54

55 Genome mapping of piRNA-sized reads from wild-type oocytes and embryos, Ziwi-IP, and  
56 *dicer-null* embryos displayed strong enrichment at repetitive elements, especially at long  
57 terminal repeat (LTR) retrotransposons (Figure 1D and 1E). Our oocyte results are consistent  
58 with prior sequencing of and Northern analysis of the zebrafish ovary<sup>1,10</sup>. In contrast, sperm-  
59 derived reads lacked LTR enrichment. Notably, reads mapping to LTRs showed a strong (3-4-  
60 fold) antisense strand bias (Figure 1F). They also carried a major sequence bias, namely a uracil  
61 at the first position (U1), and a minor bias of an adenine at the tenth position (A10) (Figure 1G  
62 and S1C). Although there is only one Piwi protein in early zebrafish embryos (Ziwi), we clearly  
63 detected the ping-pong signature, characterized by a distinct peak of a 10-bp overlap from  
64 embryonic piRNAs (Figure 1H and S1D). As testes and ovaries contain both Zili and Ziwi, and  
65 as pre-ZGA embryos do not conduct transcription to generate new substrates, the repertoire of  
66 piRNAs in early embryos is evidently generated in oocytes and deposited into early embryos.

67

68 In principle, the Piwi-piRNA pathway could mediate transposon silencing post-transcriptionally  
69 by targeting complementary RNAs for degradation. Alternatively, it could also function at the  
70 transcriptional level by affecting DNA methylation and/or the repressive histone modifications  
71 H3K9me2/3. However, DNA and LTR transposons in early zebrafish embryos are DNA  
72 hypermethylated<sup>11,12</sup>, which is the ‘default’ state in the zebrafish genome at locations without  
73 placeholder nucleosomes (which bear H2A.Z and H3K4me1<sup>13</sup>). Placeholder nucleosomes deter  
74 DNA methylation during early embryogenesis by preventing maintenance DNA  
75 methyltransferases after replication<sup>13</sup>, as zebrafish embryos do not conduct genome-wide DNA  
76 demethylation after fertilization<sup>12,14</sup>. Thus, as DNA methylation is constitutive at transposons, an  
77 additional heterochromatin mark(s) may be needed for focal repression.

78

79 To assess whether piRNAs could in principle impact H3K9 methylation to silence transposons,  
80 we first tested whether histone methylation levels were changing during early zebrafish  
81 embryogenesis. Immunostaining revealed H3K9me2 and H3K9me3 (Figure 2A and S2A)  
82 detectable in 1-cell stage embryos (15 min. post-fertilization) but absent at the 64-cell stage.  
83 However, by the 256-cell stage (pre-ZGA), H3K9me2 was largely restored, whereas H3K9me3  
84 was observable only from major ZGA onwards (sphere stage). Transcription inhibition by  $\alpha$ -  
85 amanitin (treated at the 1-cell stage, leading to late sphere-stage arrest (4 hpf)) conferred only a  
86 slight decrease in H3K9me3 and did not affect H3K9me2 (Figure S2A), suggesting that  
87 transcription is not necessary for the acquisition of H3K9me2 nor for the *de novo* establishment  
88 of H3K9me3.

89

90 To localize H3K9me2 and H3K9me3 and to compare to piRNA-mapping regions, we conducted  
91 chromatin immunoprecipitation followed by sequencing (ChIP-seq) at pre-ZGA (256-cell stage)  
92 and post-ZGA (sphere). Notably, H3K9me2 (at pre-ZGA and post-ZGA) and post-ZGA

93 H3K9me3 coincided in early embryos, whereas very limited overlap was observed in adult  
94 tissues<sup>15</sup>. Genomic mapping revealed H3K9me2/3 enrichment exclusively at two types of  
95 repeats, satellite repeats and LTRs (Figure 2B and S2B), consistent with prior work on  
96 H3K9me3<sup>16</sup>. Since embryonic piRNAs were enriched at LTRs but not at satellite repeats we  
97 focused on LTR silencing. We observed robust H3K9me3 deposition at LTR internal regions  
98 post-ZGA, but only at regions that were initially marked by H3K9me2 pre-ZGA, specifically at  
99 clusters 1 and 2, in a transcription-independent manner (Figure 2C and S2C and D). Remarkably,  
100 H3K9me3 and piRNAs from eggs and early embryos robustly and specifically co-enrich within  
101 these two clusters. Furthermore, the evolutionary conservation score (calculated based on the  
102 divergence, deletions, and insertions of LTRs<sup>17</sup>) supports clusters 1 and 2 as more conserved and  
103 thus likely more recent LTR insertions. By contrast, H3K9me2/3-depleted LTRs (clusters 3 and  
104 4), which were less conserved (older) than LTRs in clusters 1 and 2, lacked targeting piRNAs.  
105 Analysis of open chromatin via ATAC-seq data revealed that the establishment of H3K9me3 at  
106 ZGA was accompanied by decreased chromatin accessibility at clusters 1 and 2 (Figure S2C),  
107 which is consistent with their transcriptional silencing.

108  
109 To test whether loss of H3K9me3 indeed derepresses these LTRs, we expressed KDM4E, a  
110 placental animal-specific H3K9 demethylase, in early zebrafish embryos. KDM4E expression  
111 greatly reduced H3K9me2/3 levels at 4 hpf and 5.3 hpf (Figure 2D). Interestingly, RNA-seq  
112 analysis revealed the selective activation of young LTRs (clusters 1 and 2) at 5.3 hpf, which was  
113 further enhanced upon H3K9me3 removal by KDM4E expression. In contrast, older/less  
114 conserved LTRs (clusters 3 and 4), which lack H3K9me2/3, were not affected (Figure 2E).  
115 Taken together, our results show that evolutionary young LTR elements have high H3K9me3  
116 which is correlated with high levels of antisense piRNAs during ZGA, and that young LTRs are  
117 kept silent during ZGA by means of their H3K9 methylation.

118  
119 Zebrafish primordial germ cells (PGCs) are specified during early embryogenesis through germ  
120 plasm inheritance and are restricted to four cells at ZGA<sup>18</sup>. Re-analysis of published cell-type  
121 specific RNA-seq datasets from 7 hpf embryos<sup>19</sup> revealed young LTRs (e.g. cluster 2)  
122 specifically expressed in somatic cells but not PGCs (Figure 3A; clusters are defined in Figure  
123 2C). This raised the possibility that LTR chromatin and/or piRNA abundance (for transcriptional  
124 and/or post-transcriptional regulation) might differ in PGCs and somatic cells, as may be  
125 expected, at least for piRNAs, from the enrichment of Ziwi on the PGC-specifying germ plasm<sup>1</sup>.

126  
127 To examine this, we performed ATAC-seq and sRNA-seq in PGCs and somatic cells at 2.5 hpf,  
128 4 hpf, 12 hpf and 24 hpf. We found similar levels of chromatin openness at LTRs in these two  
129 cell types at all time points except for PGCs at 24 hpf, which showed closed chromatin and  
130 retained piRNAs at cluster 2 (Figure 3C and S3D). Interestingly, the piRNAs retained in PGCs  
131 represent the dominant sRNA type and correspond specifically to conserved young LTRs  
132 (clusters 1 and 2; in Figure 3B and C), whereas miRNA-sized (~22 nt) RNAs form only a small  
133 peak even after ZGA. In striking contrast, the piRNAs in somatic cells are abundant only prior to  
134 ZGA, after which miRNAs dominate and piRNAs gradually diminish. Taken together, these  
135 results suggest that piRNAs are maintained selectively in the germline cells

136  
137 Loss of Piwi-piRNA pathway components Ziwi or Zili causes sterility in zebrafish and prevents  
138 sperm or egg production, precluding genetic knockout approaches for examining their functions

139 in early embryos. We therefore utilized zebrafish-medaka hybrids as a valuable tool. Zebrafish  
140 and medaka are evolutionarily distant teleost fish that diverged ~110-150 MYA<sup>20</sup>, with largely  
141 different TE compositions and thus likely largely different piRNA populations. Both zebrafish-  
142 medaka hybrids and the reverse cross can be generated using *in vitro* fertilization<sup>21,22</sup>. These  
143 hybrids progress past gastrulation to the segmentation stage or stall at gastrulation (for embryos  
144 derived from the reciprocal cross), but do not develop further. Based on our and published data,  
145 zebrafish embryos inherit piRNAs exclusively from maternal deposition. Thus, the  
146 medaka/zebrafish hybrid system enables functional evaluation in the absence of paternal-  
147 genome-matching piRNAs on a hybrid genome with divergent paternal TE targets in both  
148 parental orientations.

149  
150 To analyze piRNA inheritance and LTR activation in the hybrids and purebred fish, we  
151 performed sRNA-seq and total RNA-seq for four types of embryos: zebrafish in-cross and  
152 zebrafish female to medaka male (termed ‘zebrafish hybrids’, named by the maternal side) at 3  
153 hpf, 5 hpf, 8 hpf and 24 hpf, as well as medaka in-cross and medaka female to zebrafish male  
154 embryos (termed ‘medaka hybrids’) at 3 hpf, 5 hpf, and 8 hpf (Figure 4A). The dynamics of  
155 sRNA length profile from hybrid embryos resemble the profile of their maternal purebred  
156 (Figure 4B). In keeping with their largely unique TE composition, small RNAs from zebrafish  
157 and medaka in-cross embryos display minimal overlap. Moreover, as was seen in purebred  
158 zebrafish embryos, virtually all LTR-derived piRNAs (24-32 nt) in hybrid embryos were derived  
159 from maternal/oocyte inheritance and not from sperm (Figure 4C). Also consistent with the  
160 results obtained from zebrafish, medaka and hybrid piRNAs display a sequence bias of U1 and  
161 A10, and the ping-pong signature of a peak of a 10-bp overlap (Figure 4E and F). Quite  
162 surprisingly, the strand bias of piRNAs was only present in zebrafish and zebrafish hybrids, but  
163 not in medaka or medaka hybrids (Figure 4D).

164  
165 In hybrid embryos, genes from both parental origins are induced during development and hybrid  
166 ZGA timing generally aligns with their maternal and not paternal ZGA timing<sup>22</sup>. To determine  
167 whether the absence of paternally-encoded piRNAs in hybrids specifically confers paternal  
168 genome LTR activation, we examined the expression of all LTR retrotransposons in our in-cross  
169 and hybrid embryos (Figure 5A, S4B and S4C). Indeed, the heatmap of medaka-origin LTRs  
170 revealed hundreds of LTRs activated in zebrafish hybrids that are largely attenuated in medaka  
171 in-cross embryos. Notably, medaka genome-encoded piRNAs targeting these attenuated LTRs  
172 were enriched in medaka in-cross and medaka hybrid embryos, but were not present in either  
173 zebrafish in-cross or zebrafish hybrid embryos (Figure 5A, B and S4D), which is consistent with  
174 their maternal inheritance. In contrast, medaka hybrids activated hundreds of LTRs of  
175 zebrafish/paternal origin, which lacked maternally-deposited targeting piRNAs. LTR expression  
176 in the medaka hybrid is less pronounced than in zebrafish hybrids, likely due to the latest (8 hpf)  
177 time-point analyzed for medaka hybrid embryos being close to the time-point of ZGA in medaka  
178 (note: medaka hybrids are inviable by 16 hpf). Taken together, these results provided by our  
179 reciprocal hybrid data causally link maternally-deposited piRNAs to transposon silencing during  
180 early embryogenesis (Figure 5C).

## 181 182 **Discussion**

183 The Piwi-piRNA system plays a central role in transposon silencing in many organisms and  
184 operates in the vertebrate germline to protect the integrity of the inherited genome. However, a

185 major gap in our understanding involves the strategy for transposon silencing during early  
186 vertebrate embryogenesis—a vulnerable time during which the production of piRNAs (and all  
187 transcription) has ceased, heterochromatin is low or absent, and the germline has not yet been  
188 defined. Of note, zebrafish lack KRAB-ZNF proteins, which are utilized extensively in mammals  
189 for transcriptional silencing of transposons. Here, through a variety of approaches, we explored  
190 the notion of parental Piwi-piRNA inheritance and implementation as a solution for transposon  
191 silencing in teleost embryos and in germline cells.

192

193 Our work provides a series of new findings on piRNA inheritance and function in early embryos  
194 and the developing germline. First, early zebrafish and medaka embryos both contain abundant  
195 piRNAs, which are exclusively maternally-inherited. In zebrafish, they are primarily anti-sense  
196 piRNAs and are solely associated with Ziwi, as Zili protein is absent in early embryos, and only  
197 returns during early larval period (3 dpf)<sup>7</sup>. As Zili is absent, piRNA generation does not occur  
198 during early embryogenesis, thus requiring reliance on the maternally-inherited Ziwi-bound  
199 piRNAs.

200

201 We find that maternally-provided piRNAs are predominantly enriched at evolutionarily young  
202 LTR retrotransposons in early embryos, and that during development they are more specifically  
203 retained within the PGCs. Later during germ cell development, this maternal piRNA pool has  
204 been implicated in fueling the zygotic ping-pong cycle<sup>7</sup>. Although inherited piRNAs are more  
205 efficiently sequestered and maintained in the nascent PGCs than in somatic cells of the embryo,  
206 maternal piRNAs are also evident in somatic cells in early embryos. Importantly, we utilized  
207 reciprocal zebrafish-medaka hybrids to provide functional evidence consistent with the use of  
208 maternally-inherited piRNAs to antagonize LTR transcript levels. Notably, the embryonic  
209 piRNAs in zebrafish coincide with locations of initial H3K9me2/3 heterochromatin  
210 establishment during early embryogenesis. This deposition of H3K9me2/3 contributes to  
211 transcriptional silencing, as diminishing H3K9me2/3 leads to increased transcription from LTR  
212 retrotransposons.

213

214 An important question now is: How do the piRNA and H3K9me2/3 findings relate to each other?  
215 Given the known effect of nuclear Piwi proteins in mouse and flies on chromatin, the most  
216 parsimonious explanation may be that the maternally-provided Ziwi-piRNA pool directs the  
217 H3K9 methylation, similar to what has been described for nuclear Piwi proteins in mouse and  
218 *Drosophila*. In the somatic cells and PGCs, this would prevent their expression – and in the  
219 PGCs this may additionally help define piRNA-generating loci. Indeed, such a maternal effect on  
220 piRNA clusters in the PGCs has been described in *Drosophila*<sup>23</sup> and effects of maternal piRNAs  
221 in the soma of fly embryos have also been described<sup>24</sup>. However, we also find that the initial  
222 gain of H3K9me2/3 does not depend on transcription, a fact that does not match the current  
223 models on nuclear Piwi/Argonaute protein activities in eukaryotes which favors the targeting of  
224 the nascent transcripts, and not the DNA directly. This requires that any Ziwi-driven H3K9  
225 methylation model to invoke a novel mode of target recognition, possibly involving Ziwi-piRNA  
226 complexes that recognize both DNA and RNA as target molecules. Here, we note that DNA  
227 targeting may potentially be facilitated by the serial DNA strand opening that occurs every 15  
228 minutes via DNA replication during cleavage stage. In addition, antisense Ziwi-bound piRNAs  
229 and their biased inheritance/stability in PGCs may also enable them to conduct LTR sense

230 transcript cleavage and/or silencing in PGCs to further limit the presence of functional TE-  
231 derived transcripts and safeguard the germline genome.

232  
233 Our findings are also compatible with a model in which focal H3K9 methylation is driven by  
234 alternative factor(s) rather than Ziwi-piRNA complexes – however, these factor(s) would need to  
235 display the same specificity for LTRs as the maternal piRNA pool. A previous study  
236 demonstrated that H3K9me3 deposition at satellite repeats depends on transcription (miR-430  
237 expression)<sup>16</sup>. However, our study suggests that the mechanism involved in initial LTR  
238 heterochromatinization is transcription independent. Here, KRAB-ZnF proteins would be  
239 excellent candidates for a transcription-independent heterochromatin trigger, since these factors  
240 act through direct DNA binding - if it were not for the fact KRAB-ZnF genes are absent from the  
241 zebrafish genome. Interestingly, the very same chromosome that harbors many of the young  
242 LTR elements targeted by piRNAs and H3K9 methylation, zebrafish chromosome 4, also  
243 harbors a large ZnF protein family of unknown function. However, transcripts for these ZnF  
244 family are not present in preZGA embryos<sup>25</sup> and the vast majority are transcribed at or after  
245 ZGA. These results, coupled with the fact that focal H3K9me2/3 acquisition at LTRs is  
246 transcription independent, would initially appear to limit their involvement. Here, future work  
247 will explore whether ZnF family proteins might be maternally inherited and help guide focal  
248 H3K9me2/3 silencing, either alone or physical in association with Ziwi-piRNA complexes – in  
249 addition to exploring a possible direct Ziwi-piRNA interaction with DNA.

250

## 251 **Methods**

252

### 253 **Zebrafish husbandry and embryo collection**

254 Zebrafish (*Danio rerio*) strains were maintained in accordance with approved institutional  
255 protocols at the University of Utah and at the IMP in Vienna, Austria. All experiments using  
256 zebrafish were approved by IACUC Protocol 20-04011 or by the 'Amt der Wiener  
257 Landesregierung, Magistratsabteilung 58 - Wasserrecht' (animal protocols GZ 342445/2016/12  
258 and MA 58-221180-2021-16). Wildtype zebrafish were from the Tübingen (Tü) strain. For  
259 hybrid generation, TLAB fish, generated by crossing zebrafish AB and the natural variant TL  
260 (Tupfel Longfin) stocks, were used as wild-type zebrafish. Transgenic Tg(kop:EGFP-F-nanos1-  
261 3'UTR) and Tg(buc:GFP) strains were used for isolating primordial germ cells, and were kindly  
262 provided by Roland Dosch lab. Embryos were maintained at 28.5°C. All developmental staging  
263 were based on the time after fertilization and morphology confirmation as described<sup>26</sup>. Embryos  
264 for ChIP and FACS were dechorionated at 1-cell stage by pronase treatment and maintained in  
265 glass or agarose coated plastic petri dish until the desired stages.

266

### 267 **Medaka husbandry and embryo collection**

268 Medaka (*Oryzias latipes*, CAB strain) were raised according to standard protocols (28°C water  
269 temperature; 14/10 hour light/dark cycle) and served as wild-type medaka. All medaka  
270 experiments were conducted according to Austrian and European guidelines for animal research  
271 and approved by the Amt der Wiener Landesregierung, Magistratsabteilung 58 – Wasserrecht  
272 under the protocol GZ: 198603/2018/14.

273

### 274 **Constructs and microinjection**

275 Zebrafish codon-optimized KDM4E fragment was synthesized and cloned into pCS2+mCherry  
276 plasmid. RNAs were *in vitro* transcribed from linearized pCS2+-drKDM4E-mCherry and  
277 pCS2+-mCherry templates using mMESSAGING mMACHINE™ SP6 transcription kit  
278 (ThermoFisher Scientific, AM1340), followed by poly adenylation reaction using Poly(A) tailing  
279 kit (ThermoFisher Scientific, AM1350). 200pg KDM4E-mCherry mRNA or 100pg mCherry  
280 mRNA was injected into 1-cell zebrafish embryos. Live embryos were collected at 4 hpf and 5.3  
281 hpf. For each batch, 25-30 embryos were used for western blotting and the 30-50 embryos were  
282 snap frozen for RNA extraction. Three to four biological replicates were collected for each  
283 condition.

284

### 285 **Drug treatment**

286 1-cell zebrafish embryos were injected with 0.2ng  $\alpha$ -amanitin as described<sup>8</sup>. Live embryos were  
287 collected at 4 hpf and 4.5 hpf according to the development of uninjected control since treated  
288 embryos arrest around 4 hpf. A-amanitin treated embryos were used for western blotting and  
289 whole mount staining. 1-cell zebrafish embryos were dechorionated and treated with 1.5 $\mu$ M  
290 flavopiridol as described<sup>27</sup>. Live embryos were collected at 4 hpf for ChIP.

291

### 292 **Western blotting**

293 4 hpf and 4.5 hpf zebrafish embryos were dechorionated by pronase and washed with 1X PBS  
294 twice. Embryo yolks were removed by adding 3X deysolking buffer<sup>28</sup>. Cells were pelleted and  
295 lysed with strong cell lysis buffer (10mM Tris-HCl pH=7.5, 50mM NaCl, 1% Triton, 0.1% SDS  
296 and 1X proteinase inhibitor) on ice for 10min. Samples are boiled at 95°C for 5min after 4X  
297 sample buffer added. Western blotting was performed as standard procedure. H3K9me2 (Abcam  
298 1220, 1:1000), H3K9me3 (Active Motif 39161, 1:1000) and H3 antibodies (Abcam ab1791 and  
299 Active motif 39763, 1:10000) were used. Signal was acquired and quantified using LI-COR  
300 Odyssey imaging system.

301

### 302 **Embryo whole-mount staining and imaging**

303 Zebrafish whole mount staining was performed as described<sup>29</sup>. H3K9me2 (Abcam 1220) and  
304 H3K9me3 (Active Motif 39161) antibody were used as primary antibodies. Donkey anti-Rabbit  
305 IgG Alexa Fluor 488 (Invitrogen, A-21206) and donkey anti-mouse IgG Alexa Fluor 594  
306 (Invitrogen, A-21203) were used as secondary antibodies.

307

### 308 **Ziwi-IP**

309 50-100 embryos/oocytes were lysed in 600  $\mu$ l lysis buffer (25mM Tris-Cl pH7.5, 150mM NaCl,  
310 1.5mM MgCl<sub>2</sub>, 1% Triton, protease inhibitors, 1mM DTT, antiRNase 1:1000), crushed by a  
311 pestle and sonicated on bioruptor (5 cycles 30"on/30"off on high power). Anti-Ziwi antibody  
312 (homemade, 1:200 dilution) was added to the cell lysate followed by 2h rotation at 4°C, then  
313 30 $\mu$ l Protein G dynabeads was added and rotated at 4°C for 1h. Beads were washed 2 times with  
314 wash buffer (50mM Tris-Cl pH 7.5, 1M NaCl, 1mM EDTA, 1% Igepal CA-630, 0.1% SDS,  
315 0.5% sodium deoxycholate) and put in 500 $\mu$ l Trizol. RNA extraction was performed following  
316 Trizol protocol, additional sodium acetate was added and precipitated overnight with glycoblue  
317 at -20°C. RNAs were labeled with P<sup>32</sup> (all IP RNA in 10 $\mu$ l with 5 $\mu$ Ci gamma-ATP), and run on a  
318 15% denaturing gel.

319

### 320 **FACS**

321 Tg(buc:GFP) inbred or outbred (Tg(buc:GFP) female x WT Tü male) embryos were collected  
322 at 2.5 hpf and 4 hpf. Tg(kop:EGFP-F-nanos1-3'UTR) inbred embryos were collected at 12 hpf  
323 and 24 hpf. For 2.5 hpf embryos, ~500 dechorionated embryos were washed twice and  
324 resuspended in pre-cold 5% FBS-PBS with 0.5M sucrose to prevent cell bursting. Cell  
325 resuspension was filtered through 100µm cell strainer and kept on ice. For 4hpf embryos,  
326 dechorionated embryos were washed three time with Ca<sup>2+</sup>-free Ringer solution to remove yolk  
327 and resuspended in 5% FBS-PBS. Cell resuspension was filtered through 40µm cell strainer. For  
328 12 hpf and 24 hpf embryos, dechorionated embryos were washed three times with Ca<sup>2+</sup>-free  
329 Ringer solution, and digested with pre-warmed trypsin at 37°C for 30min. FBS was added at  
330 1:10 ratio and 1M CaCl<sub>2</sub> was added at 1:1000 ratio. Cells were resuspended in 5% FBS-PBS and  
331 filtered through 40µm cell strainer. DAPI (1:1000) was added to all samples before sorting.

332  
333 Cell sorting was performed on BD FACSAria with 130µm nozzle for 2.5 hpf embryos, 100µm  
334 nozzle for 4 hpf embryos and 85µm nozzle for 12 hpf and 24 hpf embryos. Cells for sRNA-seq  
335 were directly collected in RLT buffer and cells for ATAC-seq were collected in 5% FBS-PBS.  
336 Two or three biological replicates of each cell types at each developmental stage were collected.

337

### 338 **Hybrid embryo generation**

339 Zebrafish hybrid and medaka hybrid embryos were generated as described before<sup>21,22</sup>.

340 Three or four biological replicates were collected at each developmental stage for each type of  
341 hybrid embryos.

342

### 343 **RNA extraction**

344 30-50 zebrafish embryos were snap frozen at desired developmental stage for each biological  
345 replicate. RNA extractions were performed using AllPrep DNA/RNA mini kit (Qiagen, 80004)  
346 with modifications. RWT buffer was used to recover both small (<200nt) and long RNAs.  
347 Extracted total RNAs were treated with TURBO DNA-free kit (Invitrogen, AM1907) to remove  
348 residual DNAs. For FACS samples, 1000-5000 PGCs or 10000 somatic cells were sorted into  
349 RLT buffer. Total RNAs were extracted using AllPrep DNA/RNA Micro Kit (Qiagen, 80204).  
350 For hybrid and medaka purebred embryos, 10-50 embryos were collected in Trizol. Total RNAs  
351 were extracted using Qiagen miRNeasy kit (Qiagen, 217004).

352

### 353 **RNA Library preparation and sequencing**

354 Sample quality were evaluated by Tapestation and only samples with RIN>8.0 (7.0 for hybrid  
355 embryos) were proceed to library preparation. Three biological replicates were collected for each  
356 developmental stage unless indicated.

357

358 Ribosomal RNA depletion from total RNA was performed using either the RiboCop rRNA  
359 Depletion Kit (Lexogen) using 500 ng of RNA per sample (zebrafish, zebrafish hybrid and  
360 medaka samples) or the Ribo-zero gold kit (medaka hybrid and mCherry or KDM4E-injected  
361 zebrafish samples). Libraries were prepared using NEBNext Ultra Directional RNA Library Prep  
362 Kit for Illumina (NEB) (zebrafish, zebrafish hybrid and medaka samples) or the Illumina TruSeq  
363 Stranded Total RNA Library Prep kit (medaka hybrid and mCherry or KDM4E-injected  
364 zebrafish samples) and checked using a Fragment Analyzer System (Agilent) before  
365 multiplexing. Sequencing was performed on Illumina HiSeqV4 SR100 and NovaSeq 150 bp  
366 paired-end sequencing platform.'



367 Small RNA libraries for WT zebrafish, medaka, hybrid embryos and sorted cells were prepared  
368 using QIAseq miRNA Library Prep with single index or UDI kit (Qiagen, 331502) and  
369 sequenced on HiSeq 65bp single-end sequencing or NovaSeq 50bp paired-end sequencing  
370 platform. sRNA libraries for *dicer-null* embryos were prepared using Illumina TruSeq Small  
371 RNA Sample Prep kit (Illumina, RS-200-0012) and sequenced on HiSeq 50bp single-end  
372 sequencing platform. sRNA libraries for Ziwi-IP samples were prepared using NEBNext  
373 Multiplex Small RNA Library Prep Set for Illumina (NEB, E7300S) and sequenced on HiSeq  
374 50bp single-end sequencing platform.

375

### 376 **Chromatin immunoprecipitation and library prep**

377 200 dechorionated embryos were collected in 1X PBS and fixed with 1% formaldehyde at room  
378 temperature for 10min. 125mM glycine was added to quench the fixation for 5min. Embryos  
379 were washed with cold PBS twice. Samples were snap frozen and stored at -80°C until enough  
380 samples were collected for ChIP experiments. 4500 2.5 hpf embryos or 1000 4 hpf embryos were  
381 used for each replicate, two or three biological replicates were collected for each condition.

382

383 1000 embryos were lysed in 1ml mild cell lysis buffer (10mM Tris-HCl pH=8.0, 10mM NaCl,  
384 0.5% NP-40, 1x proteinase inhibitor) for 10min at 4°C. Nuclei were pelleted and washed with  
385 1ml nuclei wash buffer (50mM Tris-HCl pH=8.0, 100mM NaCl, 10mM EDTA) at room  
386 temperature for 10min twice followed by incubation with 100µl nuclei lysis buffer (50mM Tris-  
387 HCl pH=8.0, 10mM EDTA, 1% SDS) on ice for 10min. 900µl IP dilution buffer (0.01% SDS,  
388 1.1% Triton X-100, 1.2mM EDTA, 16.7ml Tris-HCl pH=8.0, 167mM NaCl) was added. DNA  
389 was sonicated to 200-700bp with Branson sonifier. About 1ml soluble chromatin was pre-cleared  
390 with 20µl Ampure beads for 1h at 4°C, and then 100µl samples was taken as input. 5µg of  
391 H3K9me2 (Abcam 1220) or H3K9me3 (Abcam 8898) antibody was added to the chromatin  
392 followed by overnight incubation at 4°C. To pull down the antibody associated chromatin, 50µl  
393 Ampure beads were added and rotated at 4°C for 4-6h. Beads were washed with RIPA buffer  
394 (10mM Tris-HCl Ph=7.5, 140mM NaCl, 1mM EDTA, 0.5mM EGTA, 1% Triton X-100, 0.1%  
395 SDS, 0.1% Sodium deoxycholate) eight times, LiCl washing buffer (10mM Tris-HCl pH=8.0,  
396 1mM EDTA, 150mM LiCl, 0.5% NP-40, 0.5% DOC) twice and TE buffer (10mM Tris-HCl  
397 pH=8.0, 1mM EDTA) twice. 100ul elution buffer (10mM Tris-HCl pH=8.0, 5mM EDTA,  
398 300mM NaCl, 0.1% SDS) was added to the beads for IP samples and reverse crosslinked  
399 together with input sample at 65°C for 6h. 20mg of RNase was added and incubated at 37°C for  
400 30min. 5µl Proteinase K was added and incubated at 50°C for 2h. DNA was extracted with  
401 Ampure beads and eluted with 40µl 10mM Tris-HCl pH=8.0.

402

403 ChIP-seq libraries were prepared with NEBNext ChIP-Seq Library Prep Master Mix (NEB,  
404 E6240L) and then amplified with NEBNext High-Fidelity 2X PCR Master Mix (NEB, M0541L).  
405 Libraries were sequenced on HiSeq 125bp paired-end platform.

406

### 407 **ATAC and library preparation**

408 Sorted PGCs or somatic cells were lysed with 4µl ice-cold 1x lysis buffer (10mM Tris-HCl  
409 pH=7.4, 3mM MgCl<sub>2</sub>, 0.1% NP-40) on ice for 15min. 5µl H<sub>2</sub>O, 12.5ul 2X Tris-DMF-  
410 tagmentation buffer (20mM Tris-HCl pH=8.0, 10mM MgCl<sub>2</sub>, 20% DMF) and 2.5ul Nextera Tn5  
411 transposase were added to the lysed cells. The reaction was incubated at 37°C for 30min. 0.5µl  
412 10% SDS was added to stop the reaction followed by 5min incubation on ice. Tagmented DNAs

413 were purified with Qiagen MinElute PCR purification kit (Qiagen, 28006) and eluted with 22µl  
414 EB buffer.

415 ATAC-seq library was amplified from 20µl tagmented DNA with 25µl 2x Phusion PCR master  
416 mix (NEB, 28006) and 0.625µl of each 100mM library primers. Five cycles of pre-amplification  
417 PCR were performed (72°C for 5min, 5 cycles of 95°C 30s and 72°C 90s, hold at 4°C). 5µl of  
418 pre-amp product was used for qPCR with the same cycling condition to determine the number of  
419 additional PCR cycles required for library prep. Proper additional PCR cycles were done for the  
420 rest of pre-amp reaction and finished with 10min incubation at 72°C. Library was purified using  
421 Ampure beads and checked by Tapestation. ATAC-seq libraries were sequenced on HiSeq 125bp  
422 paired-end platform or Novaseq 50bp paired-end platform.

423

#### 424 ***De novo* transposon annotation**

425 *De novo* transposable element annotation for medaka (ensemble 90 release) genome was  
426 completed using EDTA pipeline <sup>30</sup>with following parameters: EDTA.pl --overwrite 0 --genome  
427 OL\_ens90\_sim.fa --species others --step all --cds OL\_cds\_ens90.fa --sensitive 1 --anno 1 --  
428 evaluate 1. LTR annotations for medaka genome were combined with zebrafish LTR annotations  
429 from repeatmasker for the following analyses.

430

#### 431 **sRNA-seq data analysis**

432 Unique molecular index (UMI) was firstly extracted from the paired-end fastq files of Qiagen  
433 sRNA libraries using script smallRNA\_pe\_umi\_extractor.pl. The generated fastq files were  
434 aligned to Zv10 zebrafish genome assembly using STAR (<https://github.com/alexdobin/STAR>)  
435 with the following parameters: STAR --outSAMtype BAM SortedByCoordinate --  
436 outFilterMismatchNoverLmax 0.05 --outFilterMatchNmin 16 --outFilterScoreMinOverLread 0 -  
437 -outFilterMatchNminOverLread 0 --outFilterMultimapNmax 400 --winAnchorMultimapNmax  
438 800 --seedSearchStartLmax 13 --alignIntronMax 1 --runRNGseed 42 --outMultimapperOrder  
439 Random --outSAMmultNmax 1. Reads that map to multiple locations with equal mapping  
440 quality score will be assign to one location randomly in the genome. Duplicated reads were  
441 removed from Bam files using script bam\_umi\_dedup.pl. Single-end fastq files of illumina or  
442 NEBNext libraries were directly aligned to the genome using STAR with the same parameters.  
443 sRNA fastq files from hybrid embryos and corresponding purebred controls were processed in  
444 the same way except aligning to zebrafish and medaka combined genome.

445

446 Read size and sequence frequency information were extracted using get\_bam\_seq\_stats.pl script  
447 from biotoolbox package (<https://github.com/tjparnell/biotoolbox>). Sequence logo were  
448 generated using ggplot2 (<https://ggplot2.tidyverse.org/>) and ggseqlogo  
449 (<https://github.com/omarwagih/ggseqlogo>) packages in R. Size selection was accomplished by  
450 filter\_bam.pl script from biotoolbox. Genomic distribution of sRNAs was determined by  
451 counting reads intersect with zebrafish repeatmasker annotations from UCSC using  
452 featureCounts (<http://subread.sourceforge.net/>). LTR targeted antisense/sense piRNAs were  
453 counted in regard to the orientation of LTR annotation using featureCounts. Ping-pong signature  
454 were generated for LTR targeted piRNAs using small\_rna\_signature package  
455 ([https://github.com/ARTbio/tools-artbio/tree/master/tools/small\\_rna\\_signatures](https://github.com/ARTbio/tools-artbio/tree/master/tools/small_rna_signatures)).

456

#### 457 **Total RNA-seq analysis**

458 Adapters from paired-end RNA-seq fastq files were removed using Cutadapt  
459 (<https://cutadapt.readthedocs.io/en/stable/>) and then aligned to the Zv10 zebrafish genome  
460 assembly using STAR with the following parameters: --twopassMode Basic --outSAMtype  
461 BAM SortedByCoordinate --quantMode TranscriptomeSAM --outWigType bedGraph --  
462 outWigStrand Unstranded --outFilterMultimapNmax 100 --winAnchorMultimapNmax 200 --  
463 outMultimapperOrder Random --runRNGseed 42 --outSAMmultNmax 1. Multimapped reads  
464 were assigned to one location in the genome randomly. All RNA-seq fastq files from hybrid  
465 embryos and corresponding purebred controls were aligned to a combined zebrafish and medaka  
466 genome index (both from ensembl 90 release). DR (*Danio rerio*) and OL (*Oryzias latipes*) were  
467 added to the chromosome name to distinguish the origins.

468  
469 Data for metaplot was collected using `get_binned_data.pl` from biotoolbox and plotted by  
470 `ggplot2` in R. LTR counts and gene counts were obtained by `featureCounts` and combined for  
471 differential expression analysis by `DESeq2`  
472 (<https://bioconductor.org/packages/release/bioc/html/DESeq2.html>) in R ( $p < 0.05$ ,  $\log_2FC \geq 1$ ).  
473

#### 474 **ChIP-seq data analysis**

475 Paired-end fastq files were aligned to Zv10 zebrafish genome assembly using Novoalign  
476 (<http://www.novocraft.com/products/novoalign/>) with the following parameters: -o SAM -r  
477 Random. Multimappers were assigned to one location in the genome randomly.  
478 ChIP-seq peaks were called by integrating multiple replicates using Multi-Replica Macs  
479 ChIPSeq Wrapper (<https://github.com/HuntsmanCancerInstitute/MultiRepMacsChIPSeq>) with  
480 the following parameters: --pe --nodup --cutoff 2. Heatmap was generated using `computeMatrix`  
481 `reference-point` and `plotHeatmap` in `deepTools` package  
482 ([https://deeptools.readthedocs.io/en/develop/content/list\\_of\\_tools.html](https://deeptools.readthedocs.io/en/develop/content/list_of_tools.html)). ChIP-seq signal tracks  
483 ( $\log_2$  fold enrichment) were generated by Multi-Replica Macs ChIPSeq Wrapper and visualized  
484 in IGV genome browser (<https://software.broadinstitute.org/software/igv/>).  
485

#### 486 **ATAC-seq data analysis**

487 Paired-end fastq files were aligned to Zv10 zebrafish genome assembly using Novoalign with the  
488 following parameters: -o SAM -r Random. Reads mapped to mitochondria were removed using  
489 the following command: `sed 'chrM/d' <atac_random.sam> atac_random_noChrM.sam` and  
490 converted to Bam files using `Samtools` (<http://www.htslib.org/>). Chromatin accessibility were  
491 determined by integrating multiple replicates using Multi-Replica Macs ChIPSeq Wrapper with  
492 the following parameters: --pe --min 30 --max 120 --nodup --cutoff 2.  
493

#### 494 **Data access**

495 High-throughput sequencing data from this study were deposited at Gene Expression Omnibus  
496 under accession number `GSExxxx`.

497

#### 498 **Reanalyzed public datasets**

499 Datasets are available under the following accession numbers: PGCs and somatic cells RNA-seq:  
500 GSE122480

501

#### 502 **Author Contributions**

503 Y.G. performed all experiments and data analyses unless indicated. K.R.G. generated hybrid  
504 embryos and collected purebred embryos. S.L. performed Ziwi-IP and collected *dicer null*  
505 embryos. M.E.P piloted this project. C.L.W assisted in optimizing KDM4E injection. E.J.G  
506 assisted in experimental design. B.R.C., A.P., and R.F.K. supervised the project. Y.G. and B.R.C.  
507 prepared the manuscript with input from all authors.

508

### 509 **Acknowledgement**

510 We thank J. Guo, C. Yi, N. Verma, S. Shadle and all other members in the Cairns laboratory for  
511 fruitful discussions, helpful bioinformatic and technical expertise; W. Xie lab and F. Muller lab  
512 for sharing the experimental protocols; R. Dosh lab for gifting us the transgenic zebrafish strains;  
513 M. Hobbs, S. Nielsen, R. Stewart, G. Nikkum, C. James, J. Lee, L. Graham for assistance with  
514 animal husbandry. Special thanks to B. Dalley for sequencing expertise, T. Parnell for  
515 bioinformatic expertise, J. Marvin, T. Galland and N. Choksi for flow cytometry expertise.  
516 Funding for this work involved Howard Hughes Medical Institute (support of B. R. Cairns); FFG  
517 (Headquarter grant FFG-852936), the FWF START program (Y 1031-B28), the HFSP Career  
518 Development Award (CDA00066/2015), the HFSP Young Investigator Award, and EMBO-YIP  
519 funds to A. Pauli; a DOC fellowship from the Austrian Academy of Sciences (OeAW) to K.R.  
520 Gert. Sample sequencing was performed at the High-Throughput Genomics and Bioinformatic  
521 Analysis Shared Resources (NCI, P30CA042014) at Huntsman Cancer Institute. Imaging was  
522 performed at the University of Utah Cell Imaging Core (1S10RR024761-01). Flow cytometry  
523 was performed at University of Utah Flow Cytometry Facility (NCI, 5P30CA042014-24; NIH,  
524 1S10RR026802-01). Animals were maintained in University of Utah Centralized Zebrafish  
525 Animal Resource (CZAR) facility (NIH, 1G20OD018369-01).

526

### 527 **Competing interests**

528 All authors declare no competing interests.

529

### 530 **Reference**

- 531 1. Houwing, S. *et al.* A Role for Piwi and piRNAs in Germ Cell Maintenance and  
532 Transposon Silencing in Zebrafish. *Cell* **129**, (2007).
- 533 2. Lau, N. C. Characterization of the piRNA Complex from Rat Testes. *Science* **313**, (2006).
- 534 3. Grivna, S. T., Beyret, E., Wang, Z. & Lin, H. A novel class of small RNAs in mouse  
535 spermatogenic cells. *Genes & Development* **20**, (2006).
- 536 4. Girard, A., Sachidanandam, R., Hannon, G. J. & Carmell, M. A. A germline-specific class  
537 of small RNAs binds mammalian Piwi proteins. *Nature* **442**, (2006).
- 538 5. Vagin, V. v. A Distinct Small RNA Pathway Silences Selfish Genetic Elements in the  
539 Germline. *Science* **313**, (2006).
- 540 6. Aravin, A. *et al.* A novel class of small RNAs bind to MILI protein in mouse testes.  
541 *Nature* **442**, (2006).
- 542 7. Redl, S. *et al.* Extensive nuclear gyration and pervasive non-genic transcription during  
543 primordial germ cell development in zebrafish. *Development* (2020)  
544 doi:10.1242/dev.193060.
- 545 8. Chan, S. H. *et al.* Brd4 and P300 Confer Transcriptional Competency during Zygotic  
546 Genome Activation. *Developmental Cell* **49**, (2019).
- 547 9. Giraldez, A. J. *et al.* Zebrafish MiR-430 Promotes Deadenylation and Clearance of  
548 Maternal mRNAs. *Science* **312**, (2006).

- 549 10. Houwing, S., Berezikov, E. & Ketting, R. F. Zili is required for germ cell differentiation  
550 and meiosis in zebrafish. *The EMBO Journal* **27**, (2008).
- 551 11. Macleod, D., Clark, V. H. & Bird, A. Absence of genome-wide changes in DNA  
552 methylation during development of the zebrafish. *Nature Genetics* **23**, (1999).
- 553 12. Potok, M. E., Nix, D. A., Parnell, T. J. & Cairns, B. R. Reprogramming the Maternal  
554 Zebrafish Genome after Fertilization to Match the Paternal Methylation Pattern. *Cell* **153**,  
555 (2013).
- 556 13. Murphy, P. J., Wu, S. F., James, C. R., Wike, C. L. & Cairns, B. R. Placeholder  
557 Nucleosomes Underlie Germline-to-Embryo DNA Methylation Reprogramming. *Cell*  
558 **172**, (2018).
- 559 14. Jiang, L. *et al.* Sperm, but Not Oocyte, DNA Methylome Is Inherited by Zebrafish Early  
560 Embryos. *Cell* **153**, (2013).
- 561 15. Yang, H. *et al.* A map of cis-regulatory elements and 3D genome structures in zebrafish.  
562 *Nature* **588**, (2020).
- 563 16. Laue, K., Rajshekar, S., Courtney, A. J., Lewis, Z. A. & Goll, M. G. The maternal to  
564 zygotic transition regulates genome-wide heterochromatin establishment in the zebrafish  
565 embryo. *Nature Communications* **10**, (2019).
- 566 17. Bulut-Karslioglu, A. *et al.* Suv39h-Dependent H3K9me3 Marks Intact Retrotransposons  
567 and Silences LINE Elements in Mouse Embryonic Stem Cells. *Molecular Cell* **55**, (2014).
- 568 18. Knaut, H., Pelegri, F., Bohmann, K., Schwarz, H. & Nüsslein-Volhard, C. Zebrafish vasa  
569 RNA but Not Its Protein Is a Component of the Germ Plasm and Segregates  
570 Asymmetrically before Germline Specification. *Journal of Cell Biology* **149**, (2000).
- 571 19. Skvortsova, K. *et al.* Retention of paternal DNA methylome in the developing zebrafish  
572 germline. *Nature Communications* **10**, (2019).
- 573 20. Harris, M. P. Comparative genetics of postembryonic development as a means to  
574 understand evolutionary change. *Journal of Applied Ichthyology* **28**, (2012).
- 575 21. Herberg, S., Gert, K. R., Schleiffer, A. & Pauli, A. The Ly6/uPAR protein Bouncer is  
576 necessary and sufficient for species-specific fertilization. *Science* **361**, (2018).
- 577 22. Gert, K. R. *et al.* Reciprocal zebrafish-medaka hybrids reveal maternal control of zygotic  
578 genome activation timing. *bioRxiv* (2021).
- 579 23. Akkouche, A. *et al.* Piwi Is Required during Drosophila Embryogenesis to License Dual-  
580 Strand piRNA Clusters for Transposon Repression in Adult Ovaries. *Molecular Cell* **66**,  
581 (2017).
- 582 24. Fabry, M. H. *et al.* Maternally inherited piRNAs direct transient heterochromatin  
583 formation at active transposons during early Drosophila embryogenesis. *eLife* **10**, (2021).
- 584 25. White, R. J. *et al.* A high-resolution mRNA expression time course of embryonic  
585 development in zebrafish. *eLife* **6**, (2017).
- 586 26. Kimmel, C. B., Ballard, W. W., Kimmel, S. R., Ullmann, B. & Schilling, T. F. Stages of  
587 embryonic development of the zebrafish. *Developmental Dynamics* **203**, (1995).
- 588 27. Wike, C. L. *et al.* Chromatin architecture transitions from zebrafish sperm through early  
589 embryogenesis. *Genome Research* **31**, (2021).
- 590 28. Link, V., Shevchenko, A. & Heisenberg, C.-P. Proteomics of early zebrafish embryos.  
591 *BMC Developmental Biology* **6**, (2006).
- 592 29. Zhang, B. *et al.* Widespread Enhancer Dememorization and Promoter Priming during  
593 Parental-to-Zygotic Transition. *Molecular Cell* **72**, (2018).

- 594 30. Ou, S. *et al.* Benchmarking transposable element annotation methods for creation of a  
595 streamlined, comprehensive pipeline. *Genome Biology* **20**, (2019).  
596

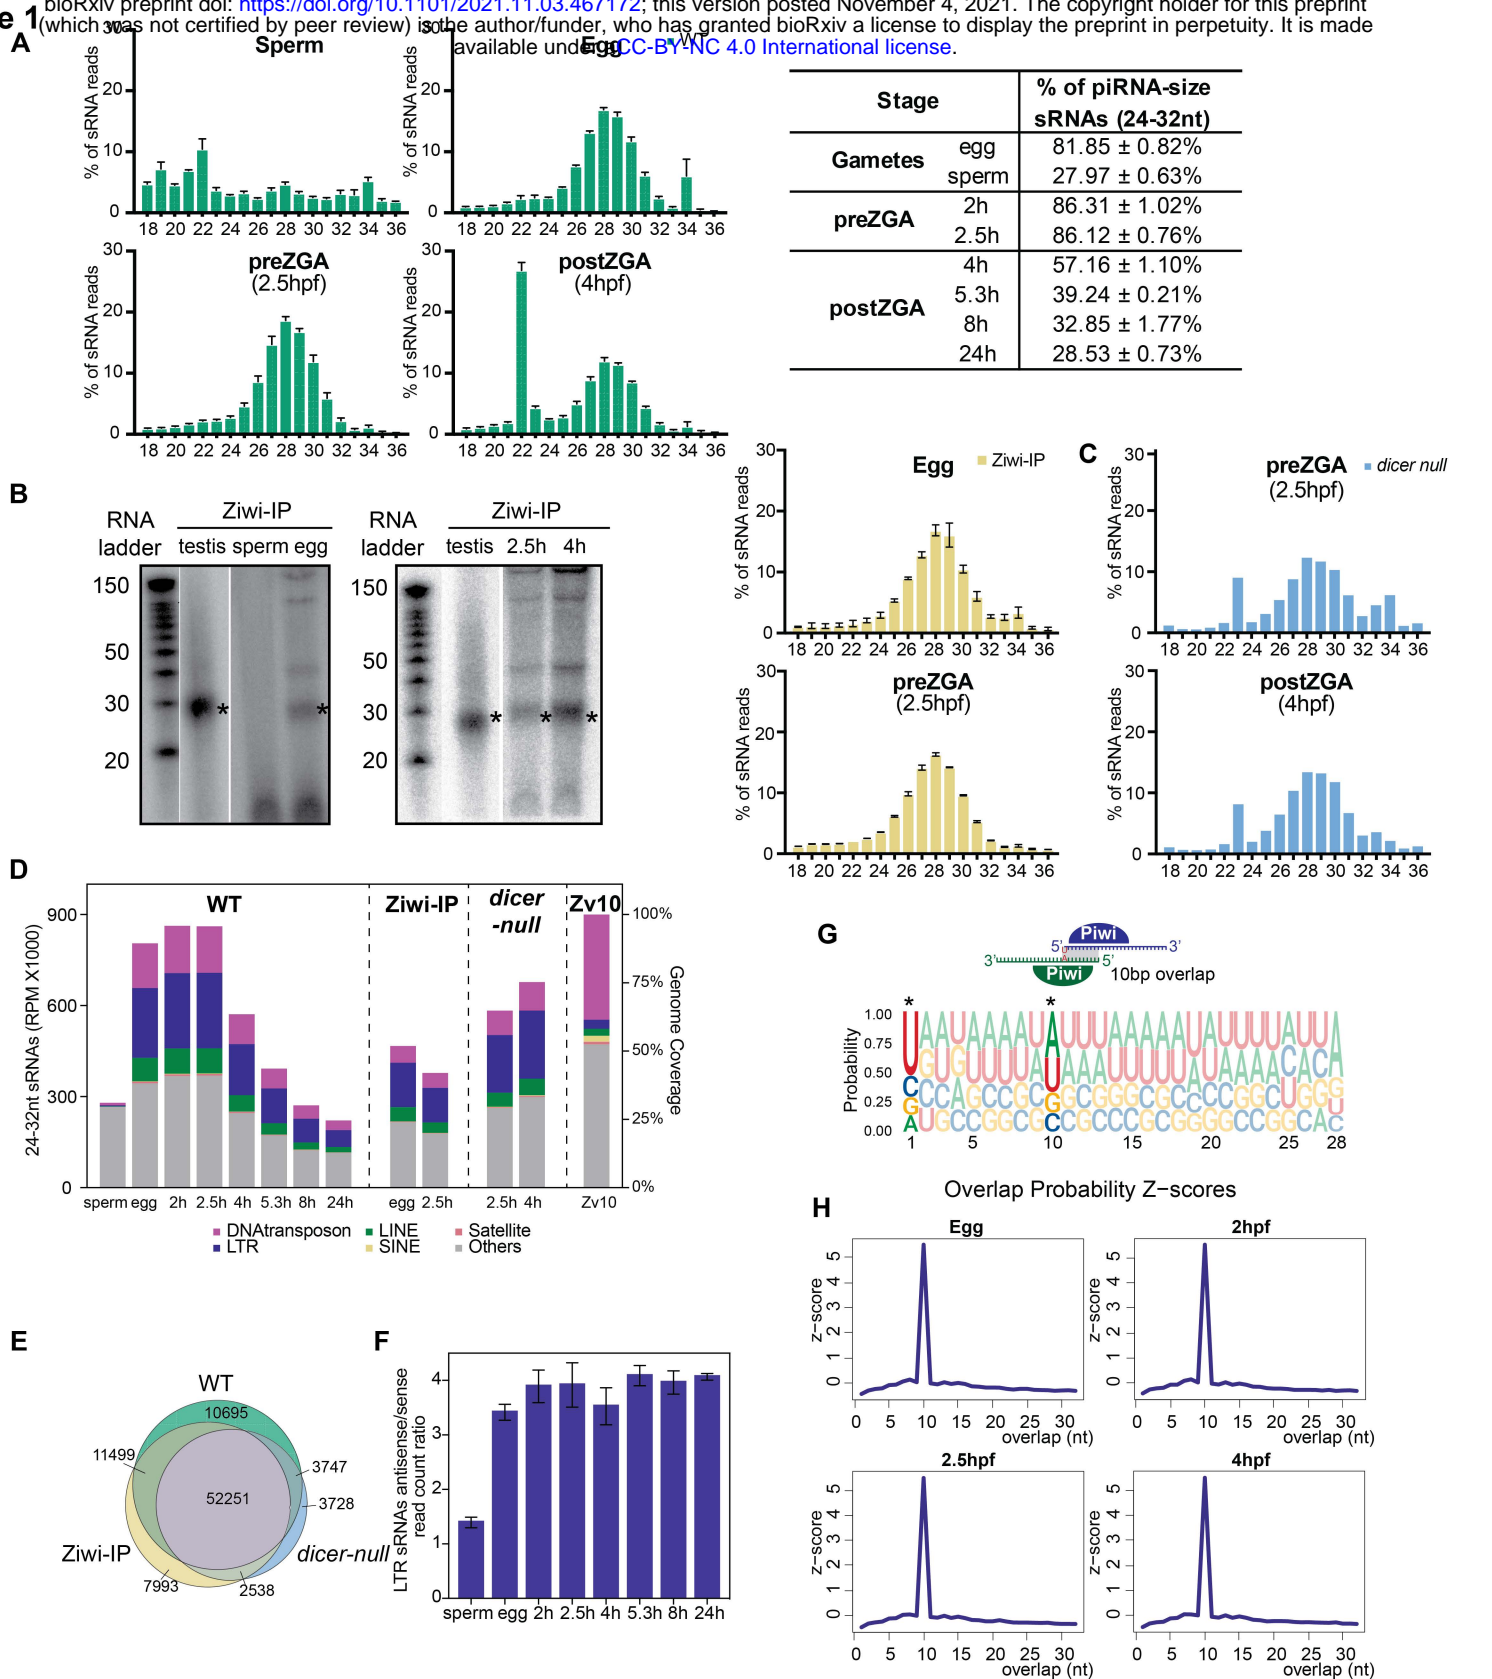

**Figure 1. Characterization of the sRNA repertoire in zebrafish gametes and early embryos.** (A) Left: size distribution of sRNAs in wild-type zebrafish sperm, egg, pre-ZGA (2.5 hpf) and post-ZGA (4 hpf) embryos. Right: quantification of piRNA-size (24-32 nt) sRNAs in zebrafish gametes and early embryos. Data are represented as means ± SEM. (B) Left: ~30 nt piRNAs are detected from egg and early embryos, but not from sperm. Right: size distribution of piRNAs pulled down by Ziwi antibody from egg and pre-ZGA embryos. (C) Size distribution of sRNAs in *dicer-null* embryos. (D) Genome distribution of 24-32 nt sRNA in WT, Ziwi-IP and *dicer-null* samples. The genome composition of the GRCz10 reference genome is shown on the right. (E) The intersection of LTRs targeted by piRNAs from WT, Ziwi-IP and *dicer-null* samples. LTRs with ≥1 mapped sRNA reads are included. (F) The ratio between antisense and sense LTR-targeting piRNAs from WT gametes and early embryos. (G) Top: Schematic representation of piRNAs sequence bias and ping-pong signature. Bottom: sRNAs from pre-ZGA embryos (2.5 hpf) carry the sequence bias of U1 and A10 (highlighted and marked by \*). (H) The ping-pong signature (peak at 10 bp overlap) is detected from the sRNA population in eggs and early embryos.

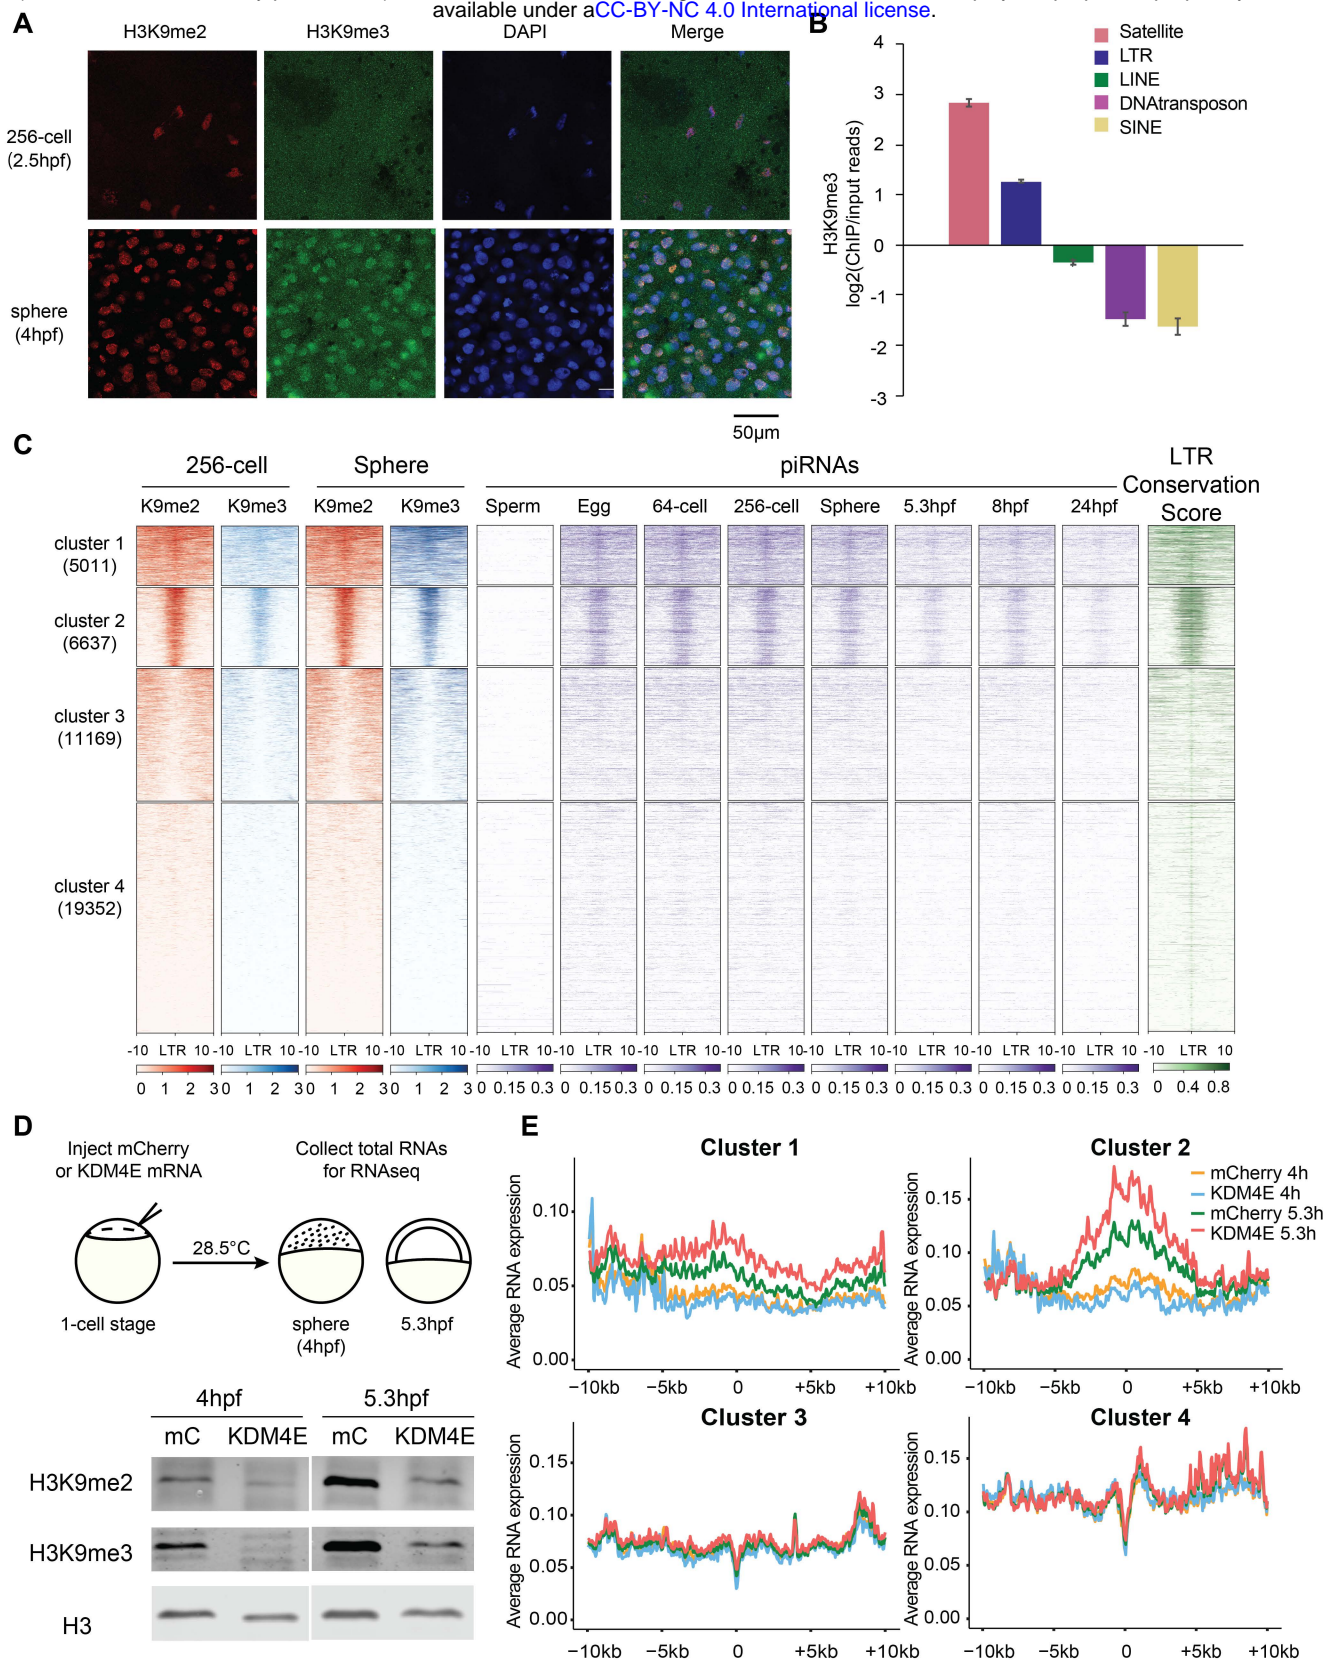

**Figure 2. Establishment of the repressive histone marks H3K9me2/3 at piRNA-enriched, evolutionary young LTRs.** (A) Immunofluorescence staining of H3K9me2 (red), H3K9me3 (green) and DAPI (blue) in pre-ZGA (256-cell stage, 2.5 hpf) and post-ZGA (sphere, 4 hpf) embryos. (B) Sphere stage H3K9me3 ChIP-seq reads enrich at satellite repeats and LTR retrotransposons in the genome. (C) Heatmap of H3K9me2 (red), H3K9me3 (blue), embryonic piRNAs, and conservation score at LTR internal regions. K-mean clustering shows that LTR internal regions from clusters 1 and 2 have high H3K9me2 pre- and post-ZGA and gain H3K9me3 during ZGA, whereas cluster 3 and 4 lack H3K9me2/3 enrichment. Egg and embryonic piRNAs enriched at clusters 1 and 2. LTR conservation score (green) indicate that clusters 1 and 2 are young elements. (D) Top: schematic representation of the experimental procedure of H3K9me2/3 removal in early embryos. Bottom: both H3K9me2 and H3K9me3 levels are significantly attenuated by KDM4E expression at 4 hpf and 5.3 hpf. (E) Metaplots of the LTR internal region expression by cluster in mCherry or KDM4E mRNA injected embryos at 4 hpf and 5.3 hpf. Clusters are defined in panel C.



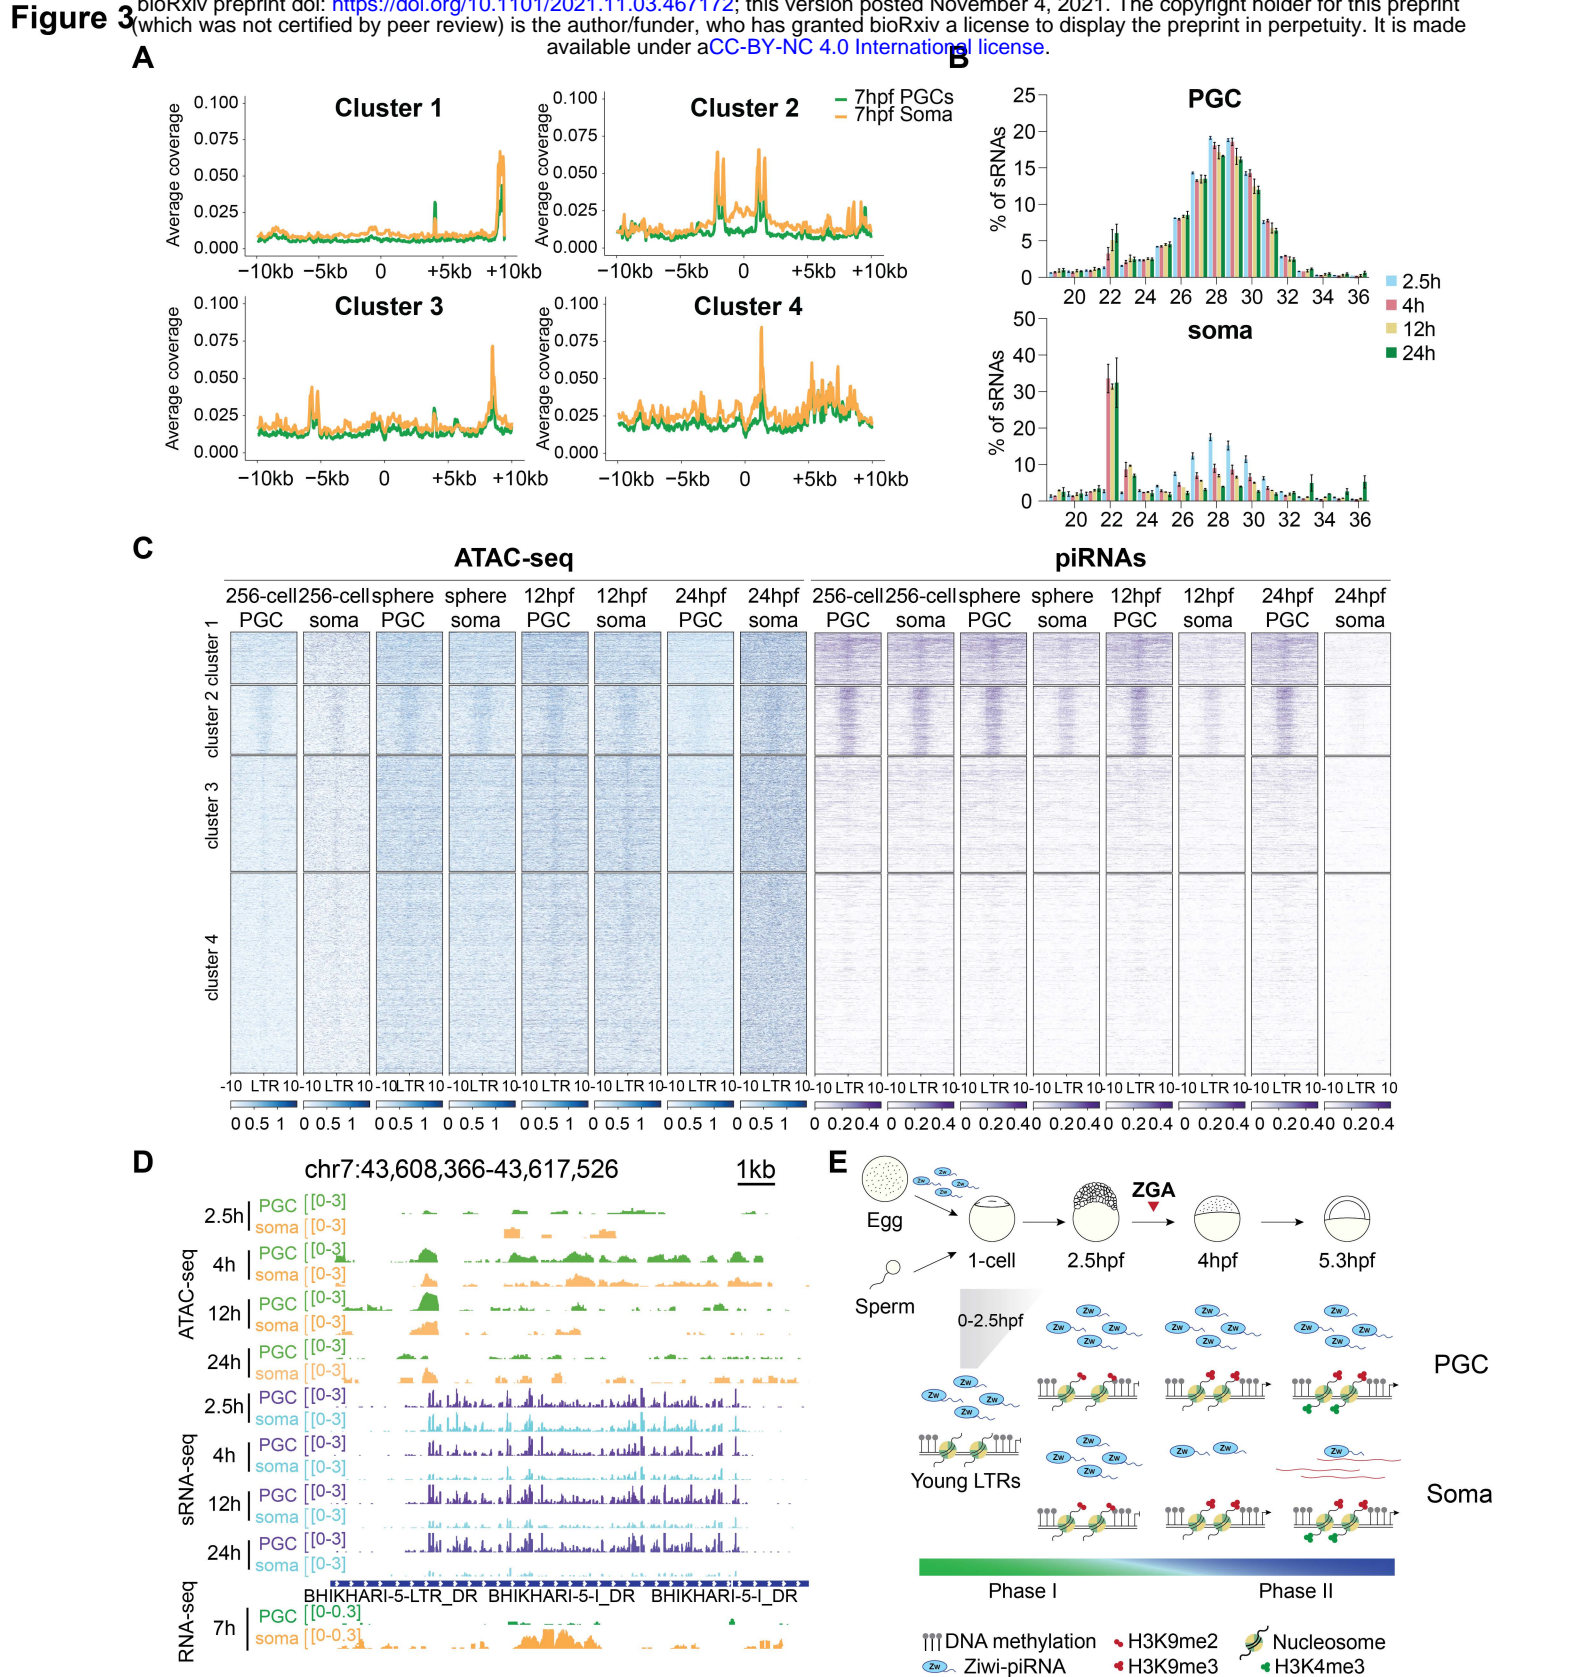

**Figure 3. The abundance of piRNAs and transposon transcripts diverges in PGCs and somatic cells. (A)** Metaplots of LTR internal region expression by cluster in PGCs (green) and soma (orange) from 7 hpf embryos. **(B)** Size distribution of sRNAs in PGCs and soma from pre-ZGA (2.5 hpf) and post-ZGA (4 hpf, 12 hpf and 24 hpf) embryos reveals maintenance of piRNAs specifically in PGCs. **(C)** The chromatin accessibility and piRNA abundance at LTR internal region clusters in PGCs and somatic cells. Clusters in panel A and C are the same as Figure 2C. **(D)** A genome browser snapshot of representative LTR internal region shows higher abundance of LTR transcripts and lower abundance of piRNAs in soma than in PGCs, but no difference in the extent of chromatin openness/accessibility (by ATAC-seq). **(E)** A model depicting piRNA protection of the genome via transposon silencing in two phases during early embryogenesis. During phase I, maternal piRNAs are deposited into all cells in the early embryo, prior to the establishment of repressive marks and prior to germ cell specification. At 2.5 hpf, H3K9me2 is established at piRNA-targeted young LTRs, followed by H3K9me3 during ZGA. The diverging piRNA populations in PGC and soma indicates the beginning of phase II. We hypothesize that piRNAs are specifically retained/maintained in PGCs to continue to keep young LTRs attenuated in germ cells but not in somatic cells.

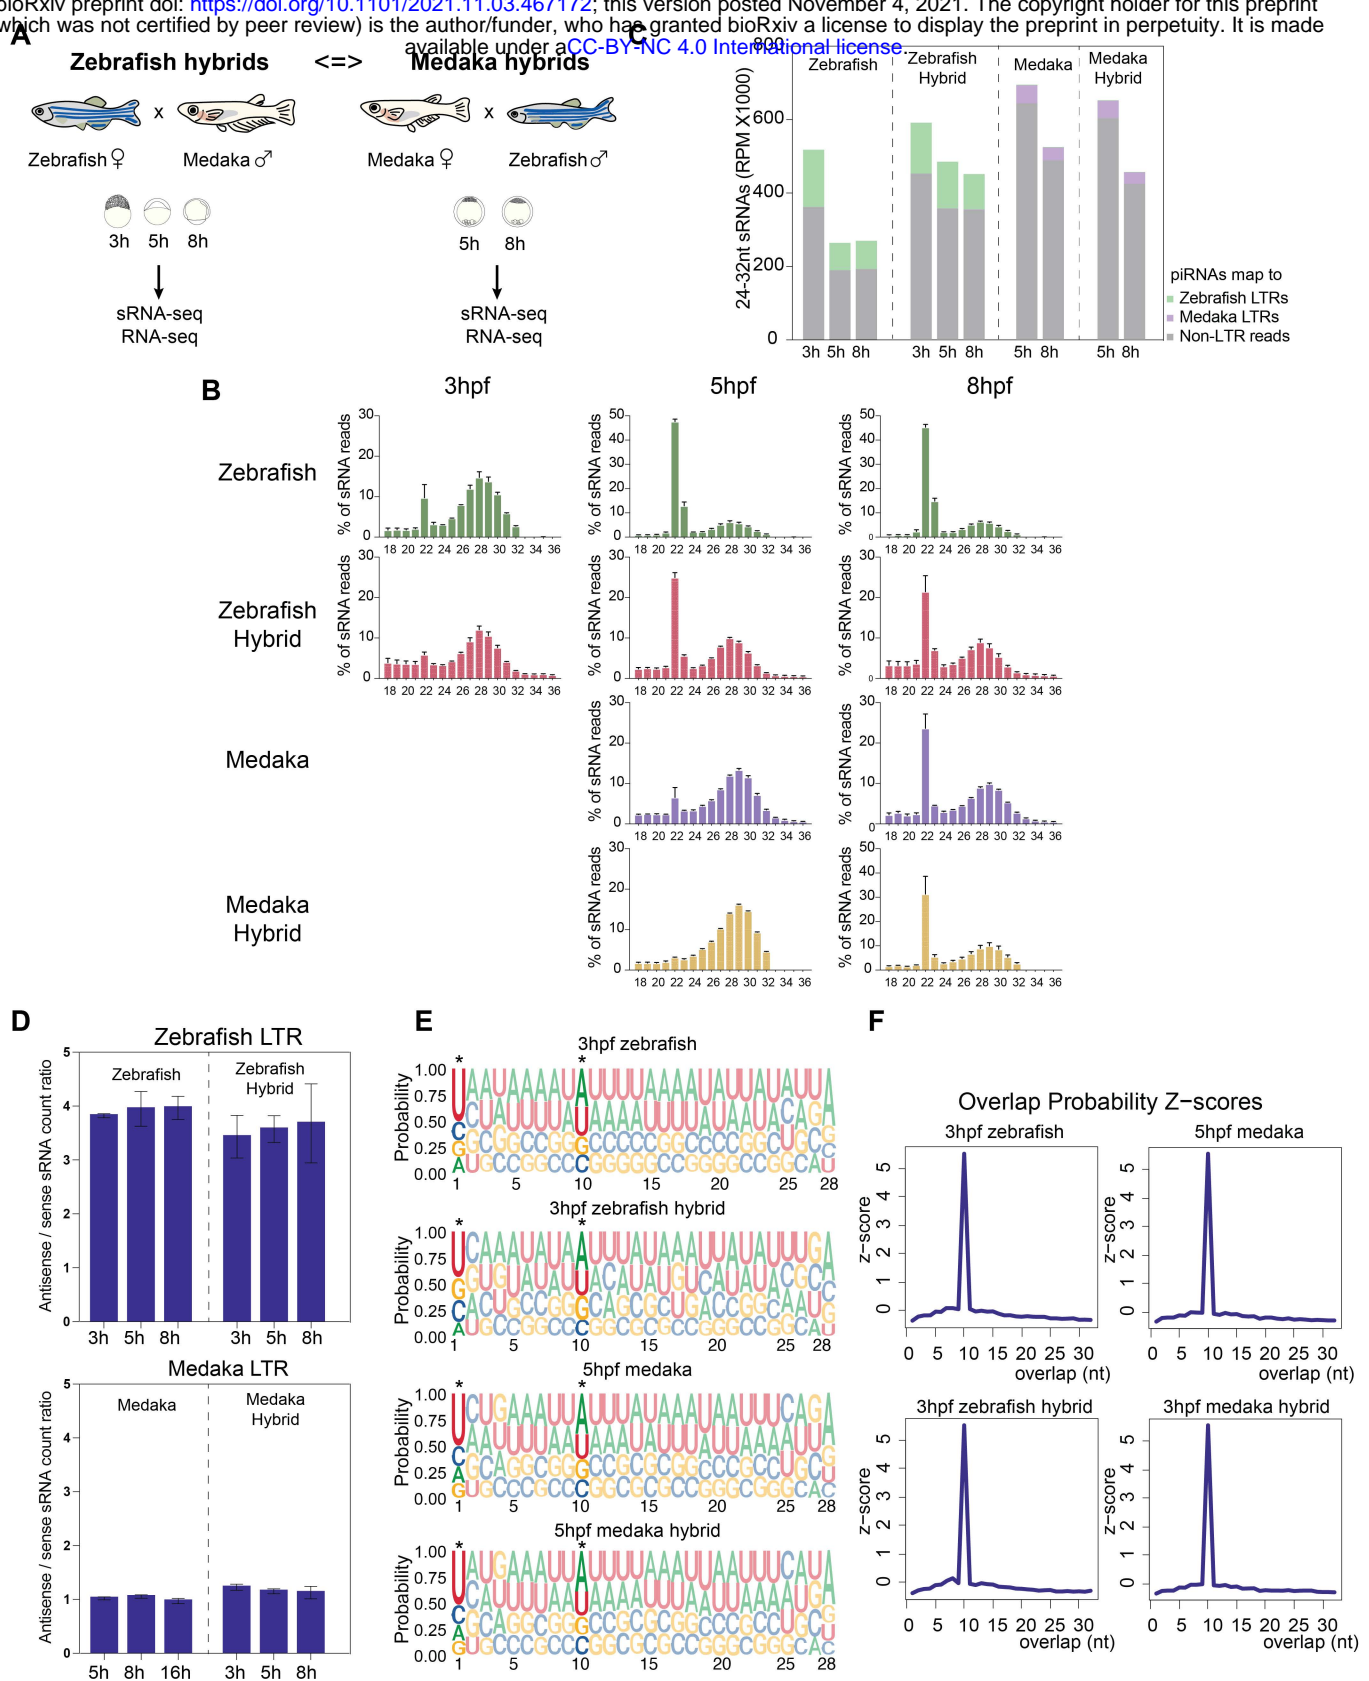

**Figure 4. Characterization of sRNA profiles in zebrafish-medaka hybrid embryos.** (A) Schematic representation of the experimental setup for generating zebrafish and medaka hybrid embryos by reciprocal crosses. Note: hybrid embryos are named by the maternal side. (B) Size distribution of sRNAs in zebrafish, medaka, zebrafish hybrid and medaka hybrid embryos. (C) LTR-targeting piRNAs in hybrid embryos are primarily contributed by maternal deposition. (D) The strand bias of LTR-targeting sRNAs is only observed in zebrafish and zebrafish hybrid embryos, but not in medaka or medaka hybrid embryos. (E) piRNA-size sRNAs in zebrafish, medaka, zebrafish hybrids and medaka hybrids carry piRNAs sequence bias of U1 and A10 (highlighted and marked by \*). (F) piRNA-size sRNAs in zebrafish, medaka, zebrafish hybrids and medaka hybrids carry the piRNA ping-pong signature (10bp overlap).

**A**

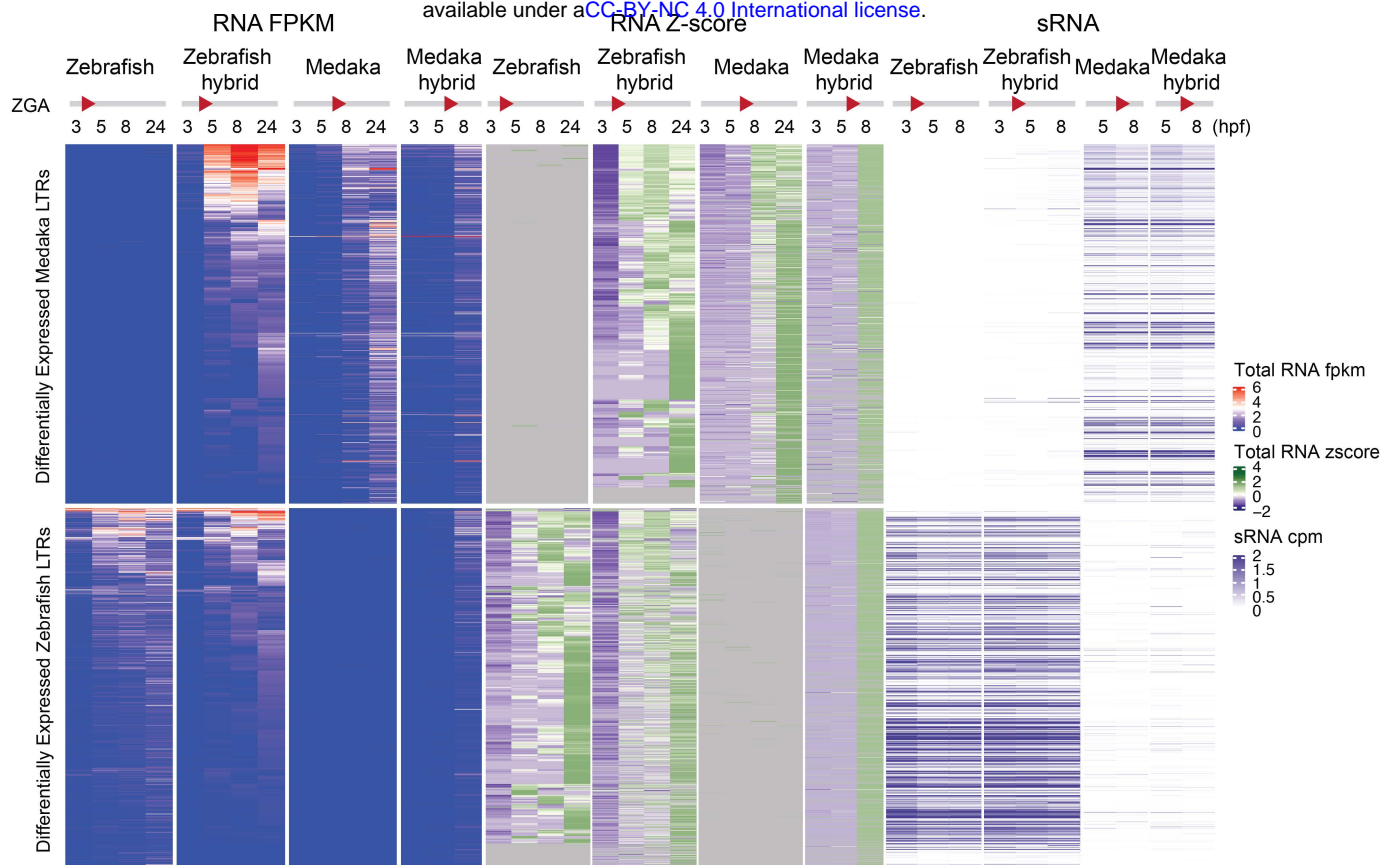

**B**

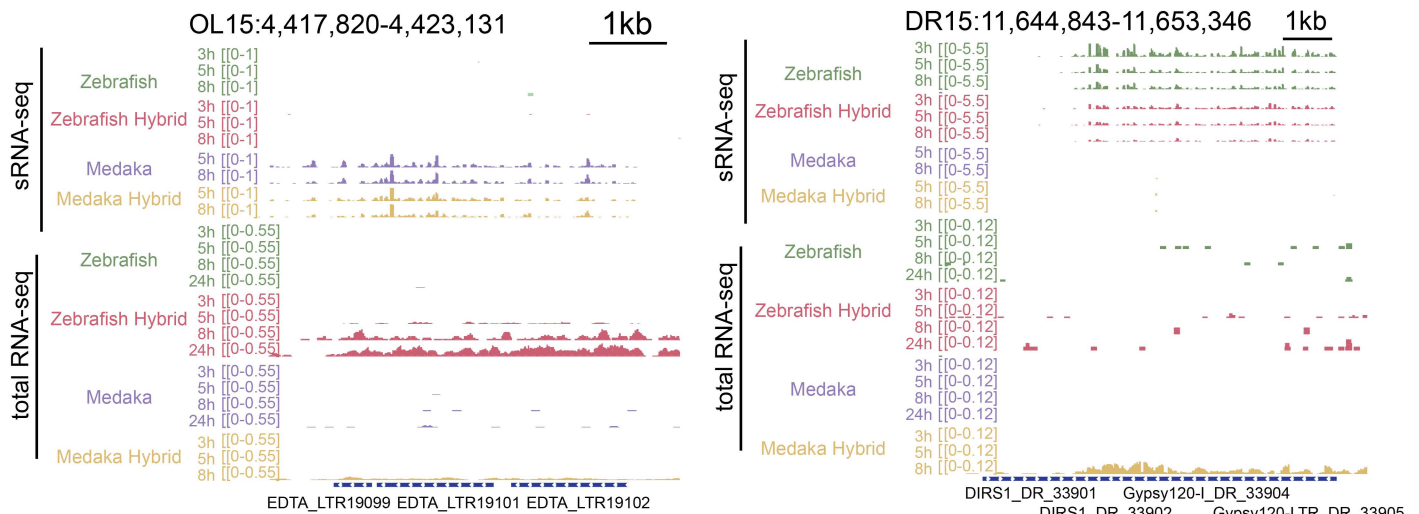

**C**

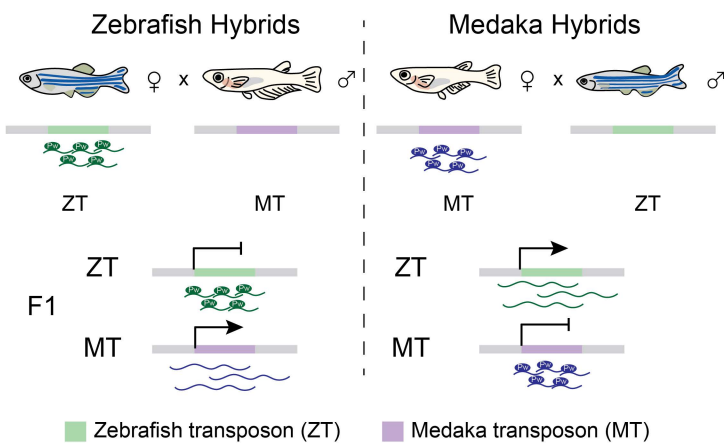

**Figure 5. LTRs from the paternal genome are selectively desilenced in the absence of parental-encoded piRNAs. (A)** Heatmaps of the expression of activated medaka-(top) and zebrafish-(bottom) origin LTRs (FPKM and Z-score) and sRNA abundance in zebrafish, medaka, zebrafish hybrid, and medaka hybrid embryos. ZGA time is marked by the red triangle next to the developmental time. **(B)** Examples of activated medaka (left) and zebrafish (right) LTRs in zebrafish hybrid and medaka hybrid embryos, respectively. **(C)** A graphic summary of the sRNA and total RNA-seq results from hybrid embryos. The absence of piRNAs targeting the paternal LTRs results in their desilencing.
